# Supplementary material for: Intraoperative fluorescence imaging with aminolevulinic acid detects grossly occult breast cancer: a phase II randomized controlled trial
Source: Springer Nature journal article supplement (doi:10.1186/s13058-021-01442-7), 2021-07-12

# Supplementary Figure 3

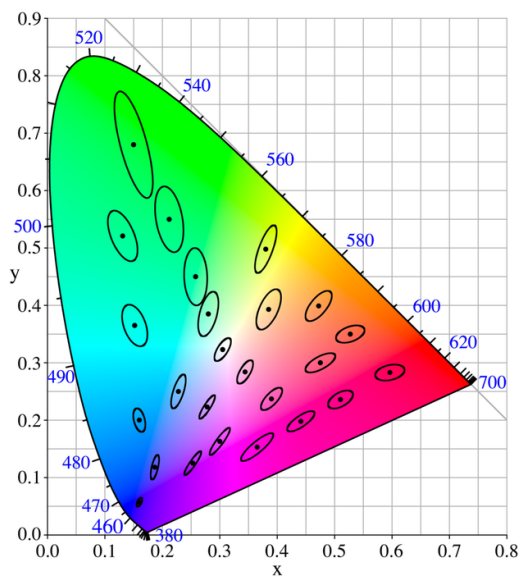

Supplement: MOESM3 [file 19354094]
